# Supplementary material for: Structural Analysis of the Novel Variants of SARS-CoV-2 and Forecasting in North America
Source: MDPI journal article supplement (doi:10.3390/v13050930), 2021-05-17
Supplement: s1 [file s1]

## Supplementary Materials

### **Structural analysis of the novel variants of SARS-CoV-2 and forecasting in North America**

Authors: Elena Quinonez<sup>1</sup>, Majid Vahed<sup>2</sup>, Abdolrazagh Hashemi Shahraki<sup>2</sup>, and Mehdi Mirsaiedi<sup>2\*</sup>

**Table S1.** Alteration of some amino acids of SARS-CoV-2 variants are presented relative to ancestral sequence of the Wuhan isolate

| Variants  | Amino acid positions relative to ancestral sequence of the Wuhan isolate |    |    |     |     |     |     |     |     |     |     |     |     |     |     |     |     |     |      |      |
|-----------|--------------------------------------------------------------------------|----|----|-----|-----|-----|-----|-----|-----|-----|-----|-----|-----|-----|-----|-----|-----|-----|------|------|
|           | 69                                                                       | 70 | 80 | 144 | 215 | 242 | 243 | 244 | 417 | 452 | 484 | 501 | 570 | 614 | 681 | 701 | 716 | 982 | 1118 | 1176 |
| Wild type | H                                                                        | V  | D  | -   | D   | L   | A   | L   | K   | L   | E   | N   | A   | G   | P   | A   | T   | S   | D    | V    |
| B.1.1.7   | -                                                                        | -  | *  | -   | *   | *   | *   | *   | *   | *   | *   | Y   | D   | *   | H   | *   | I   | A   | H    | *    |
| B.1.351   | *                                                                        | *  | A  | Y   | G   | -   | -   | -   | N   | *   | K   | Y   | *   | *   | *   | V   | *   | *   | *    | *    |
| P.1       | *                                                                        | *  | *  | Y   | *   | *   | *   | *   | *   | *   | K   | *   | *   | *   | *   | *   | *   | *   | *    | *    |
| B.1.617   | *                                                                        | *  | *  | Y   | *   | *   | *   | *   | *   | R   | Q   | *   | *   | *   | R   | *   | *   | *   | *    | *    |

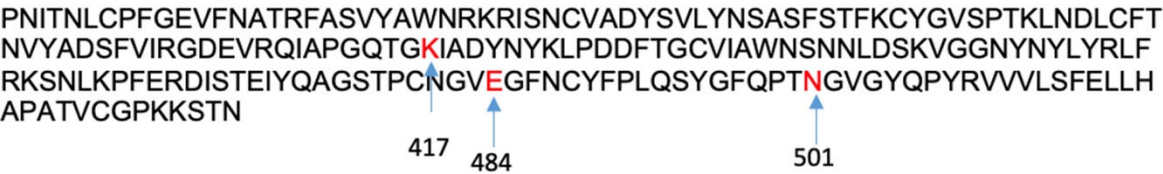

Figure S1. Sequence alignment of S-RBD of SARS-CoV-2 genes with mutations K417N, E484K, N501Y

**a**

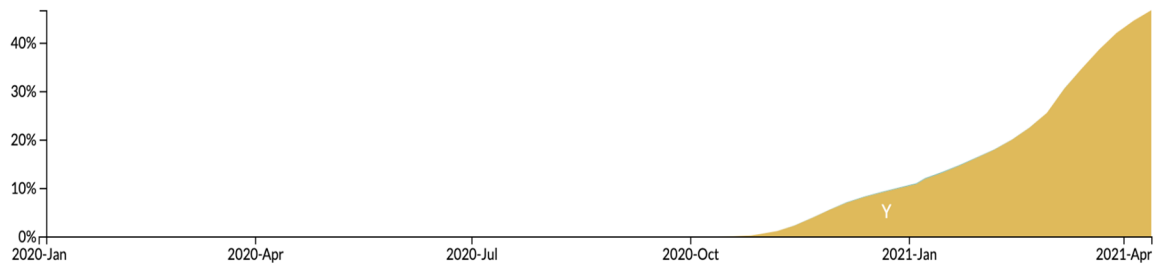

**b**

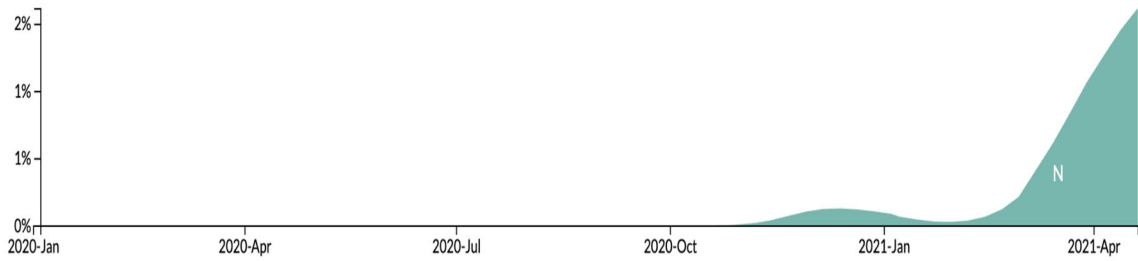

**c**

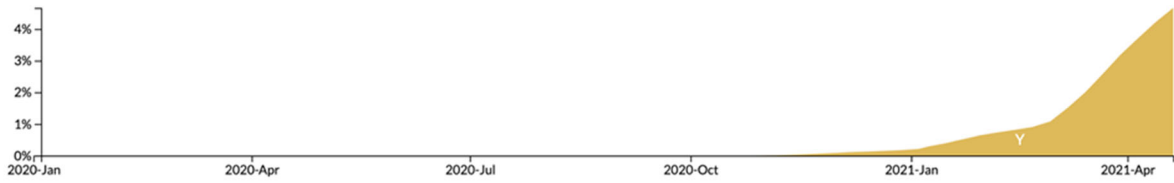

**d**

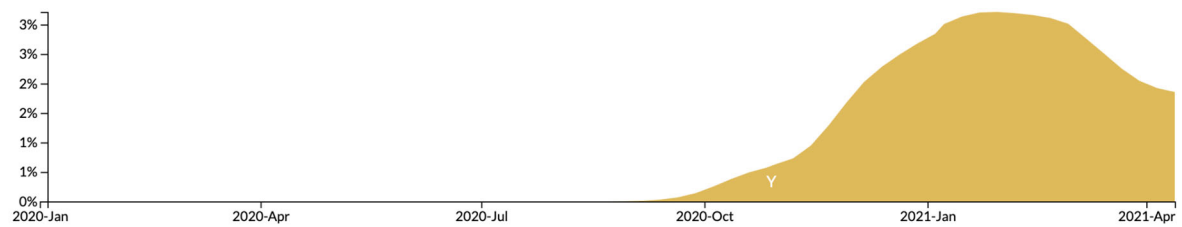

Figure S2: Frequency of novel variants of SARS-CoV 2 over time collected from North American subsample. a) B.1.1.7, b) B.1.617, c) P.1 and d) B.1.351

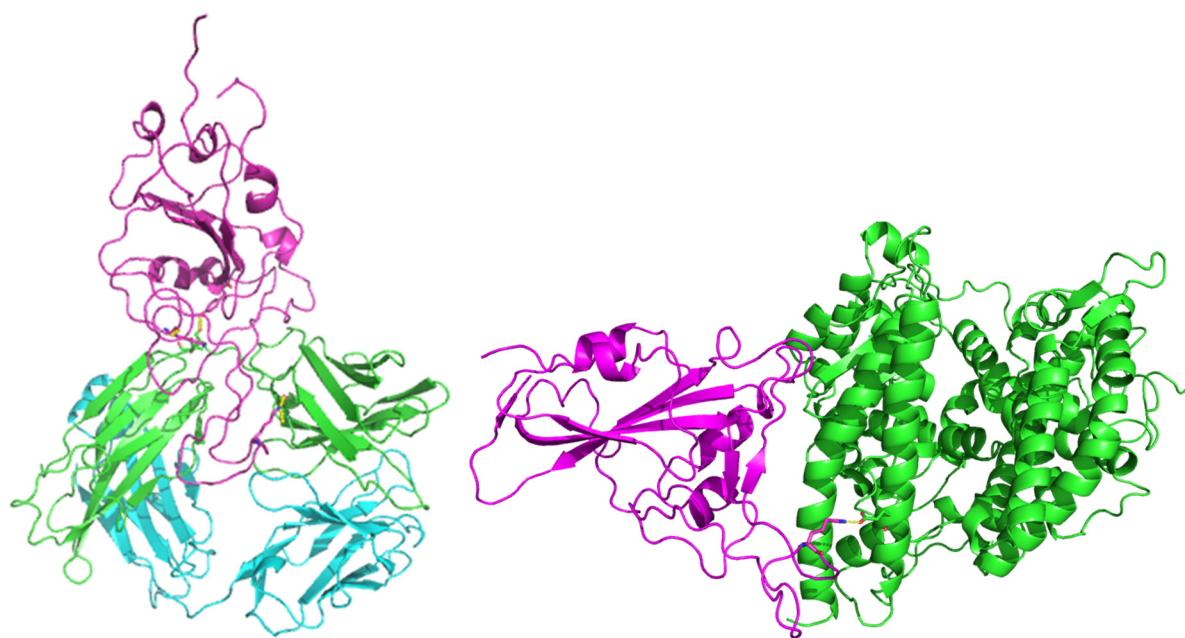

Figure S3: Docking structures of the interaction of E484K mutant of SARS-CoV-2 S-RBD protein in complex with a potent neutralizing CV30 antibody/hACE-2.

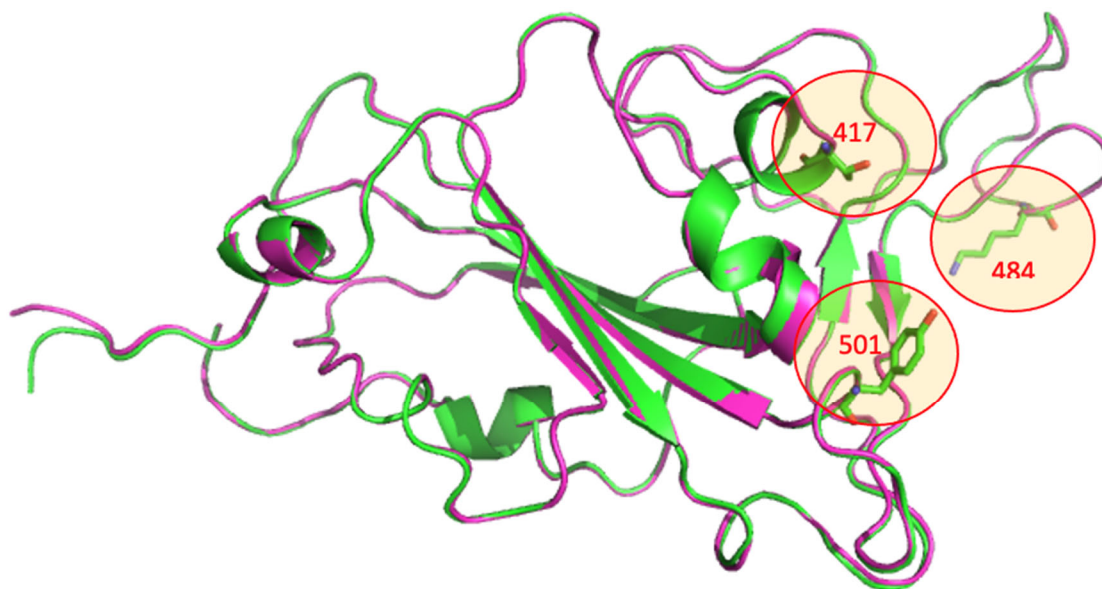

Figure S4. Superposition of wild/mutant SARS-CoV-2 S-RBD protein structures. The red rings in the photo indicate the three mutation points in the S-RBD that are in the flexible coil region. The structure displayed in purple indicates wild and the green color indicates mutated.

a) WT-CV30

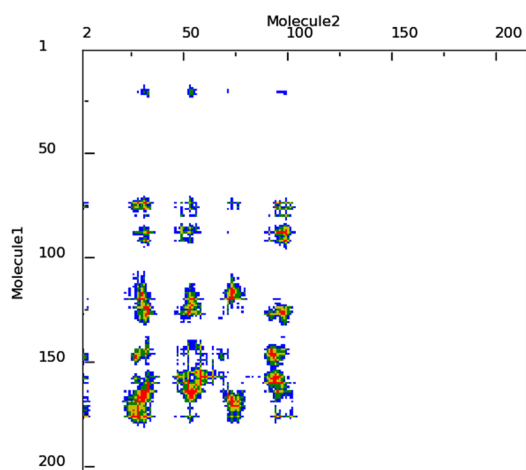

b) B.1.1.17-CV30

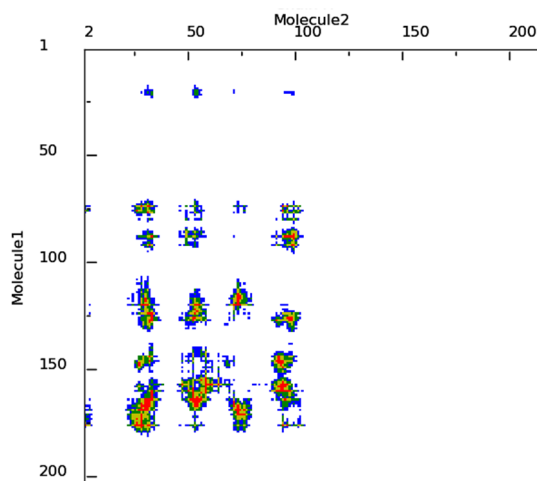

c) B.1.351-CV30

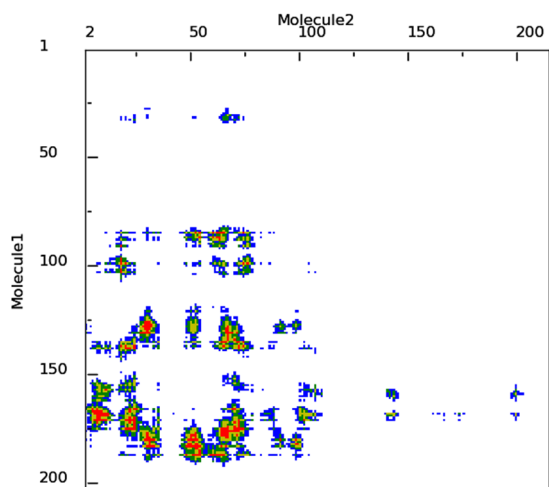

d) P.1-CV30

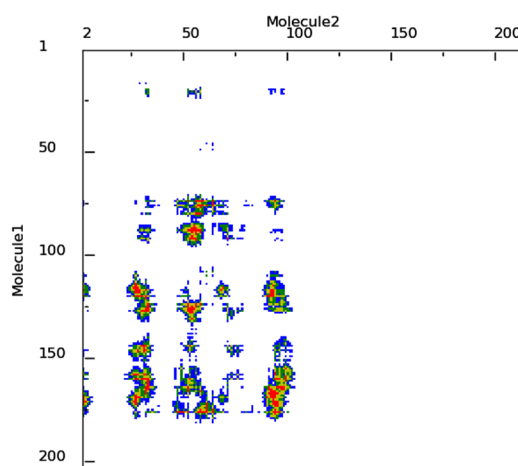

e) B.1.617-CV30

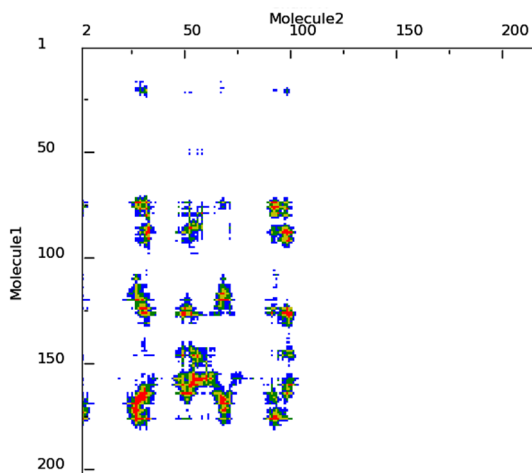

f) 484-CV30

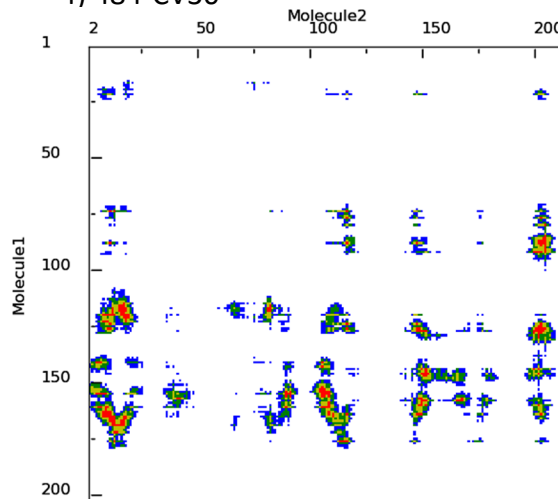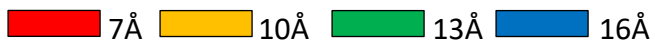

Figure S5: COCOMAPS distance contact maps for Interaction of different variants of SARS-CoV 2 spike with neutralizing antibody (CV30)/ACE-2. The color codes are reported in the legends under the maps.

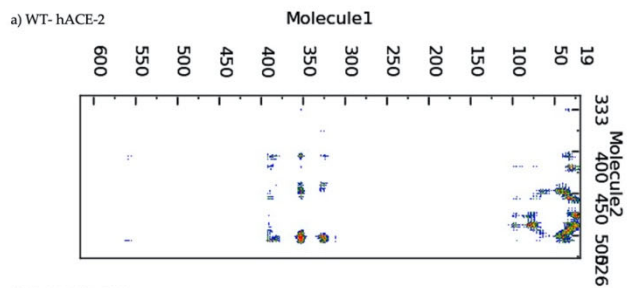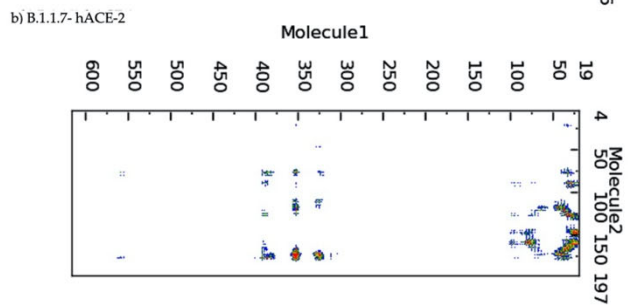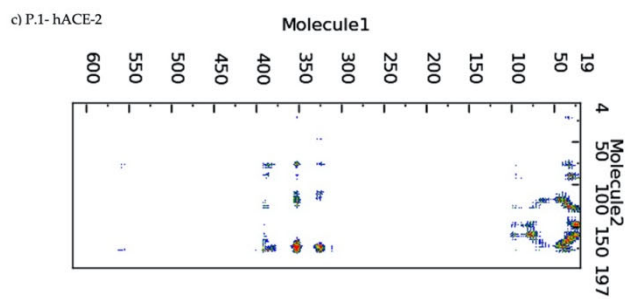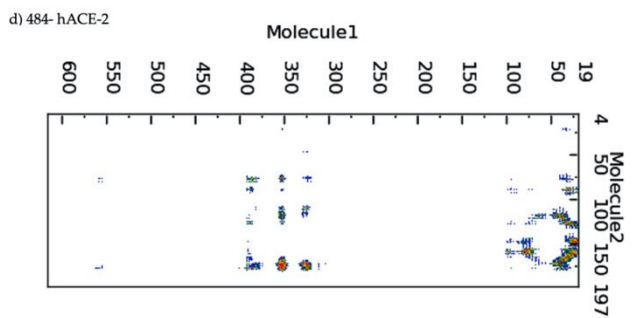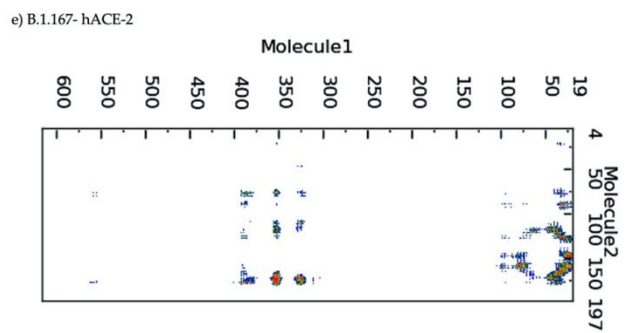

7Å 10Å 13Å 16Å

Figure S5: COCOMAPS distance contact maps for Interaction of different variants of SARS-CoV-2 spike with neutralizing hACE-2. The color codes are reported in the legends under the maps.
